# Supplementary material for: Positron Emission Tomography: Updates on Imaging of Addiction
Source: Atypon-hosted journal article supplement (doi:10.1176/appi.neuropsych.19080169), 2019-10-01
Supplement: jnp_19080169_correction01.pdf [file jnp_19080169_correction01.pdf]

## **Corrections to Solingapuram Sai et al.**

When the article “Positron Emission Tomography: Updates on Imaging of Addiction” by Solingapuram Sai et al. (doi: 10.1176/appi.neuropsych.19080169) was originally printed in the Fall 2019 issue, Dr. Solingapuram Sai’s name was incorrect. His name was corrected and the article reposted on October 24, 2019.
